# Supplementary material
Source: publisher figshare collection journal article supplement (https://karger.figshare.com/ndownloader/files/24493292)
Supplement: Supplementary file 1 [file 24493292]

**Suppl. Table 5. Univariate analysis of the risk factors for combined events in patients with renal TMA a**

|  | Hazard ratio | 95% Confidence intervals | | *P* value |
| --- | --- | --- | --- | --- |
| Lower | Upper |
| sex | 0.49 | 0.22 | 1.11 | 0.086 |
| age | 0.99 | 0.96 | 1.03 | 0.666 |
| MAP | 1.02 | 1.00 | 1.03 | **0.042** |
| PLT | 1.00 | 1.00 | 1.00 | 0.823 |
| Hb | 0.99 | 0.98 | 1.00 | 0.101 |
| LDH | 1.00 | 1.00 | 1.00 | 0.253 |
| Hypocomplementemia | 1.75 | 0.85 | 3.59 | 0.129 |
| Proteinuria | 1.04 | 0.89 | 1.20 | 0.647 |
| eGFR | 0.98 | 0.96 | 0.99 | **0.005** |
| RAS inhibitors | 1.26 | 0.58 | 2.72 | 0.561 |
| Immunosuppressants | 0.82 | 0.40 | 1.69 | 0.595 |
| Plasma exchange or infusion | 1.02 | 0.44 | 2.37 | 0.958 |
| FPW | | | | |
| FPW <869nm | 1 |  |  |  |
| FPW ≥869nm | 3.91 | 1.64 | 9.31 | **0.002** |
| Endothelial cell swelling and subintimal myxoid edema scoreb | | | | |
| 0-1 | 1 |  |  | **0.049** |
| 2 | 2.26 | 0.82 | 6.22 | 0.115 |
| 3 | 2.65 | 1.20 | 5.85 | **0.016** |
| Onion skin lesion scoreb | | | | |
| 0 | 1 |  |  | **0.004** |
| 1-2 | 4.39 | 1.21 | 15.93 | **0.025** |
| 3 | 8.17 | 2.32 | 28.84 | **0.001** |
| Tubular atrophy/interstitial fibrosis | | | | |
| 1 | 1 |  |  | **0.004** |
| 2 | 2.24 | 0.68 | 7.33 | 0.184 |
| 3 | 5.07 | 1.85 | 13.85 | **0.002** |
| Abbreviations: TMA, thrombotic microangiopathy; MAP, mean arterial pressure; PLT, platelet; Hb, hemoglobin; LDH, lactate dehydrogenase; eGFR, estimated glomerular filtration rate; RAS, renin-angiotensin system; FPW, foot process width.  aPathological variables without significance were not shown.  bThe two categories were combined to maximize statistical power. | | | | |
